# Supplementary material for: Global ethics and the role of academics
Source: Royal Society of Chemistry journal article supplement (doi:10.1039/c9ra09351f), 2008-12-01
Supplement: c9ra09351f1.pdf [file c9ra09351f1.pdf]

## Supplementary data

### Efficient tri-metallic oxides for oxygen evolution reaction

Abdul Qayoom Mugheri<sup>a</sup>, Aneela Tahira<sup>b</sup>, Umair Aftab<sup>c</sup>, Adeel Liaquat Bhatti<sup>d</sup>, Nusrat Naeem Memon<sup>a</sup>, Jameel-ur-Rahman Memona, Muhammad Ishaque Abro<sup>c</sup>, Aqeel Ahmed Shah<sup>e</sup>, Magnus Willander<sup>b</sup>, Ahmed Ali Hullio<sup>a</sup>, Zafar Hussain Ibupoto<sup>\*a</sup>

<sup>a</sup> Dr. M.A Kazi Institute of Chemistry University of Sindh Jamshoro, 76080, Sindh Pakistan

<sup>b</sup> Department of Science and Technology, Campus Norrkoping, Linkoping University, SE-60174 Norrkoping, Sweden

<sup>c</sup> Mehran University of Engineering and Technology, 7680 Jamshoro, Sindh Pakistan

<sup>d</sup> Institute of Physics University of Sindh Jamshoro, 76080, Sindh Pakistan

<sup>e</sup> NED University of Engineering Science and Technology, Karachi, Sindh Pakistan

**Corresponding author:** Zafar Hussain Ibupoto, PhD

**Email address:** [zaffar.ibhupoto@usindh.edu.pk](mailto:zaffar.ibhupoto@usindh.edu.pk)

S1:(A) pristine CuO, (B) pristine NiCo<sub>2</sub>O<sub>4</sub>

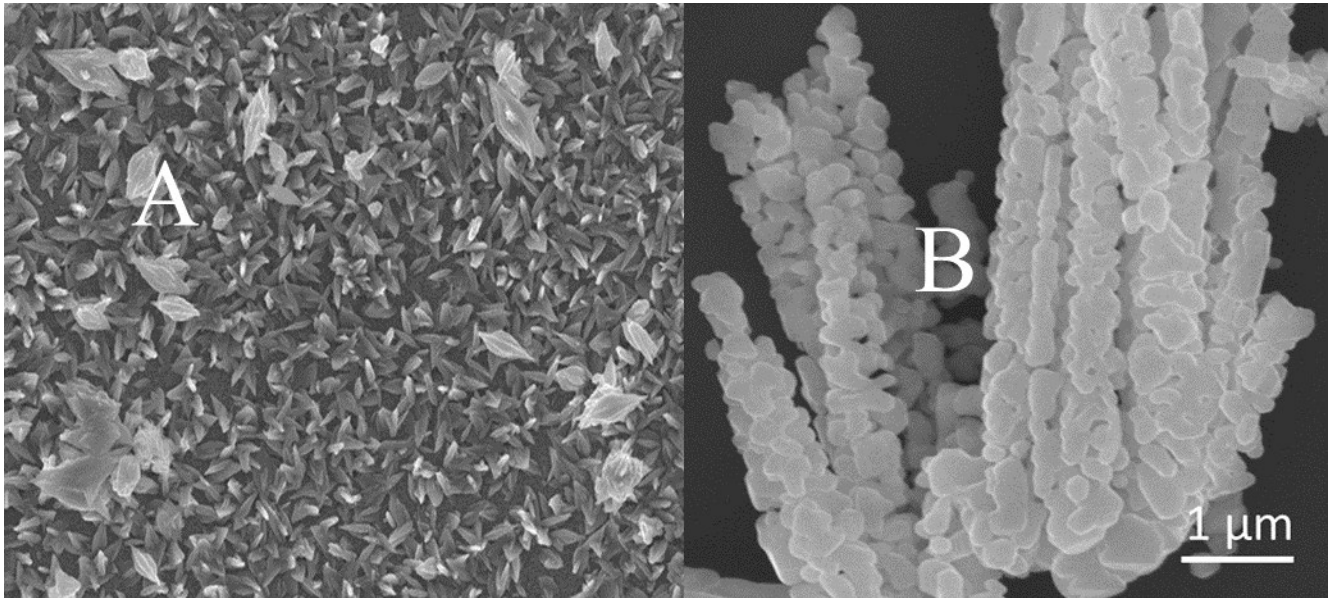

S2:

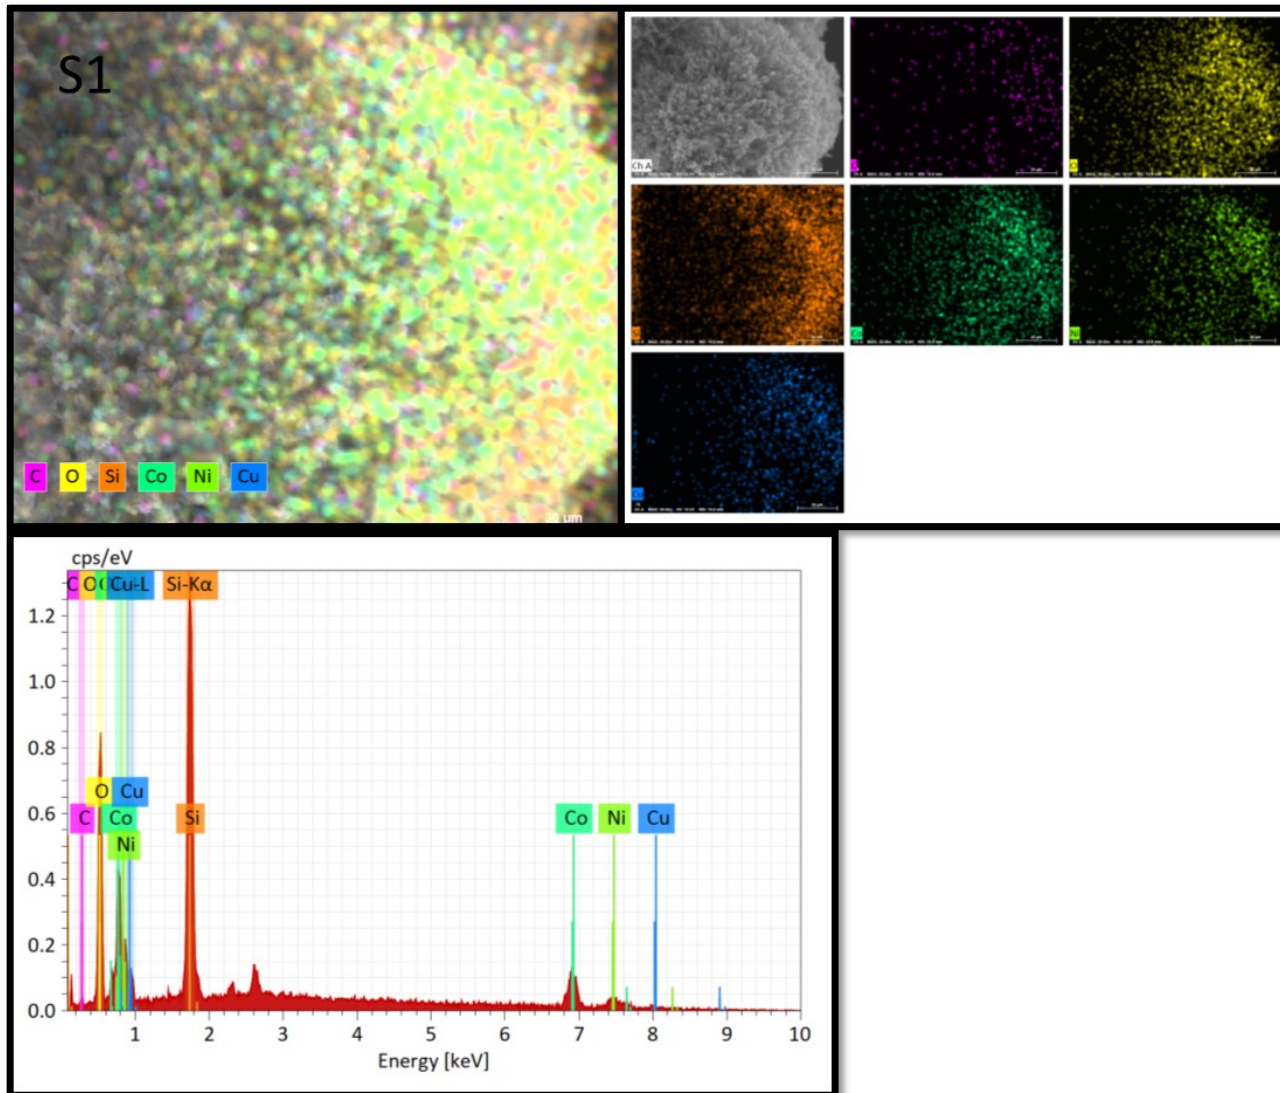

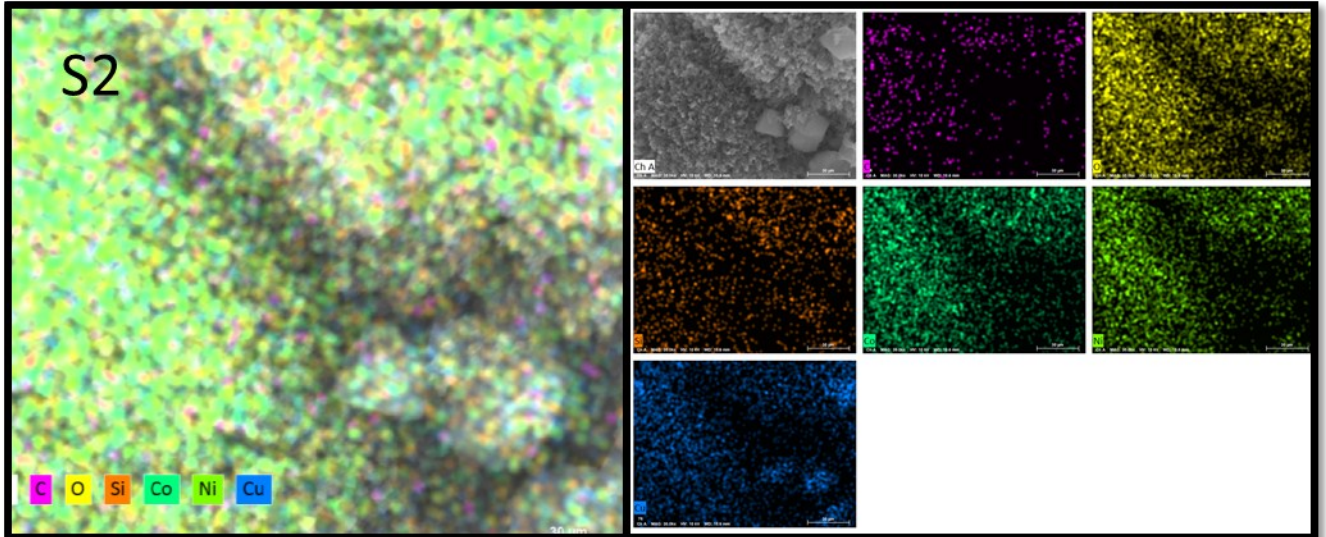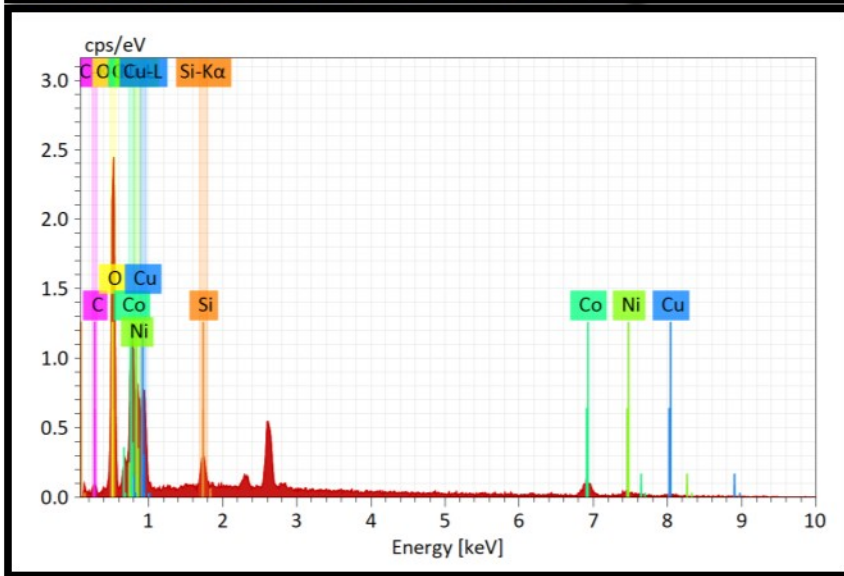

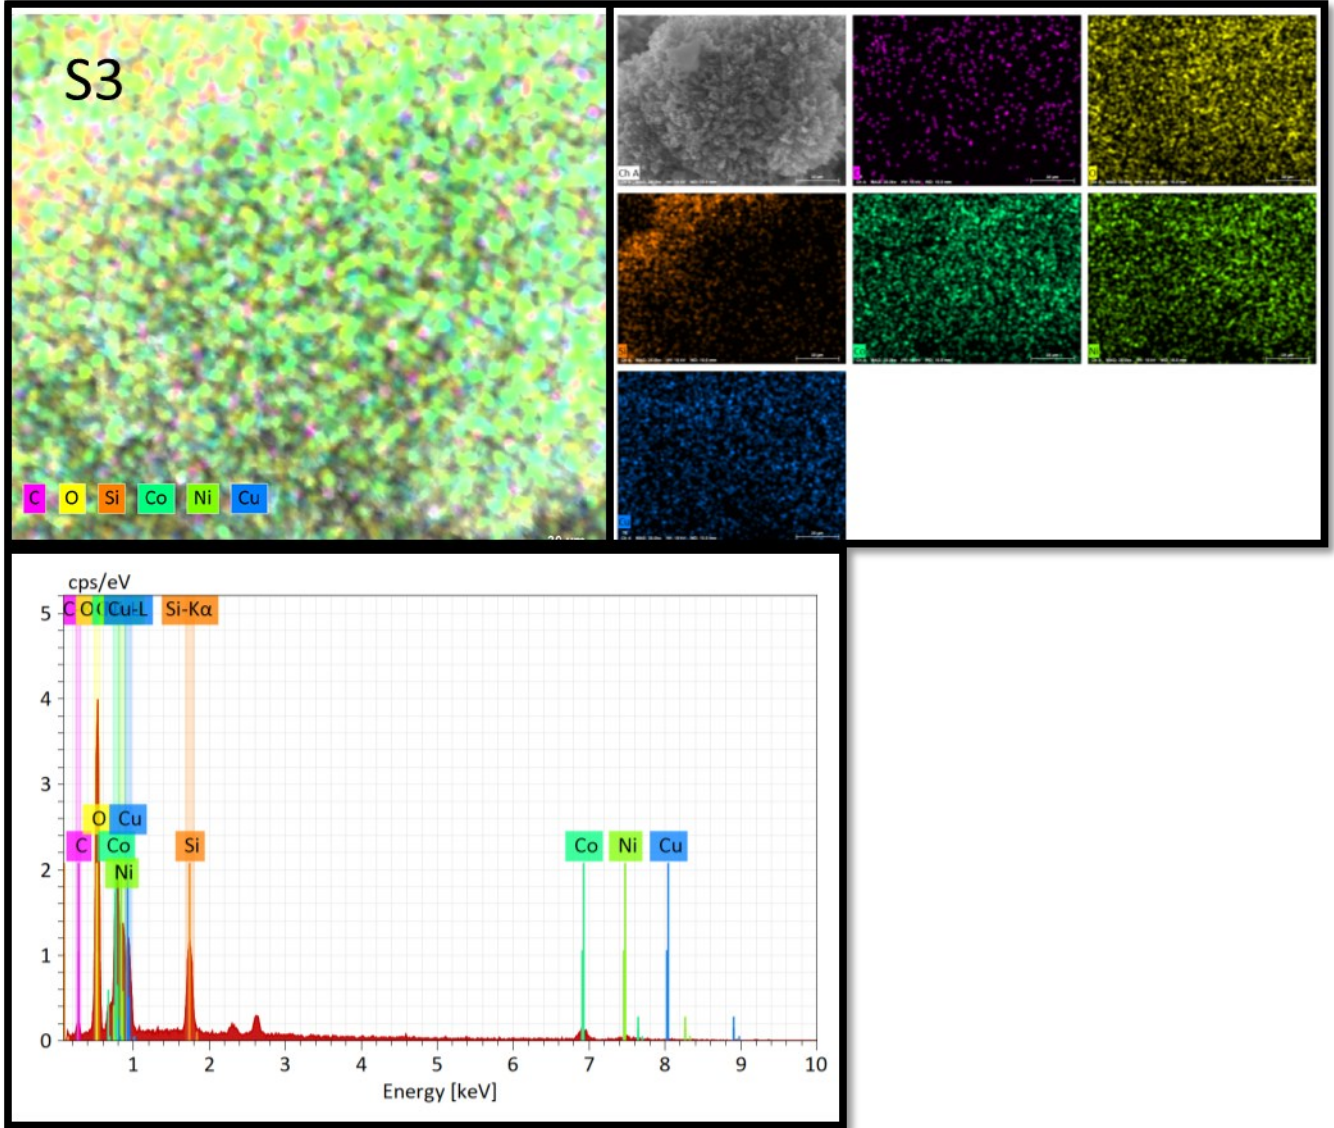

**S3:** shows the equivalent circuit model for the impedance analysis

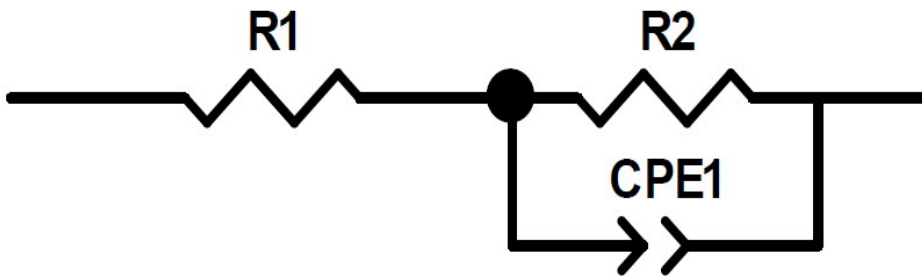

**Table S1:** Comparison of OER performance-based oxide electrocatalysts in alkaline media with recently reported works.

| Catalyst                               | Tafel slope (mVdec <sup>-1</sup> ) | Overpotential (V) @ 10 mA/cm <sup>2</sup> | References.  |
|----------------------------------------|------------------------------------|-------------------------------------------|--------------|
| CoCo LDH                               | 59                                 | 393                                       | 1            |
| CoOx@CN                                | N/A                                | ~385                                      | 2            |
| Co-P films                             | 47                                 | 345                                       | 3            |
| MnCo <sub>2</sub> Ox                   | 84                                 | >410                                      | 4            |
| Co <sub>3</sub> O <sub>4</sub> /N-rmGO | 67                                 | 310                                       | 5            |
| NiCoOx                                 | N/A                                | 420                                       | 6            |
| N-G-CoO                                | 71                                 | 340                                       | 7            |
| Ni <sub>x</sub> Co <sub>3-x</sub> O    | 59~64                              | ~370                                      | 8            |
| NiCo <sub>2</sub> O <sub>4</sub> /CuO  | 94                                 | 230                                       | Present work |

## References

1. F. Song and X. Hu J. Nature Communications 2014, 5, 4477.
2. H. Jin, J. Wang, D. Su, Z. Wei, Z. Pang and Y. Wang J. Am. Chem. Soc. 2015, 137, 7, 2688-2694.
3. N. Jiang D. B. You and M. Sheng, J. Angewandte Chemie. 2015, 18, 6251-6254
4. F. Song and X. Hu J. Am. Chem. Soc., 2014, 1364716481-16484.
5. Y. Liang, Y. Li, H. Wang, J. Zhou, J. Wang and T. Regier J. Nature Materials, 2011, 10, 780–786.
6. C. C. L. McCrory, S. Jung, J. Peters J. Am. Chem. Soc., 2013, 26-28.
7. X. Cui, P. Ren, D. Deng, J. Deng and X. Bao, J. Energy Environ. Sci., 2016, 9, 123-129.
8. Y. Li, P. Hasin Y. Li and P. Hasin J. advanced materials., 2010, 4, 1926-1929.
